# Supplementary material
Source: PubMed Central journal article supplement (PMC3607405)

Supplementary Figure 1

A. AOCS (high-grade serous cases)

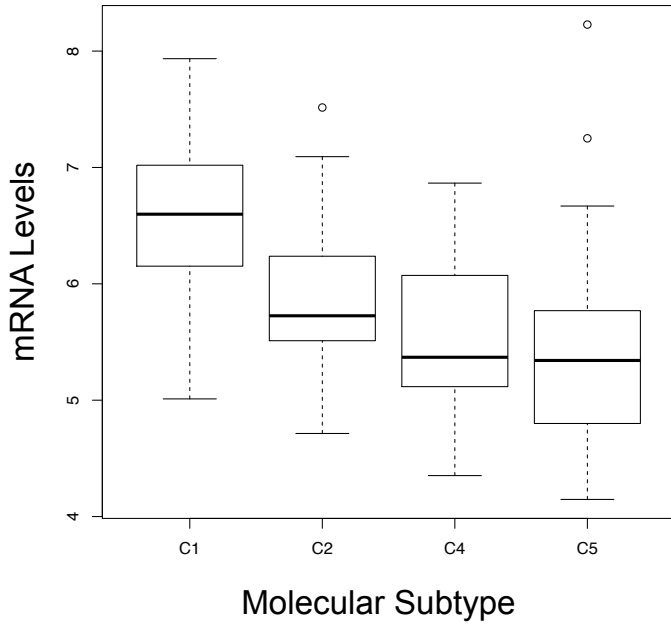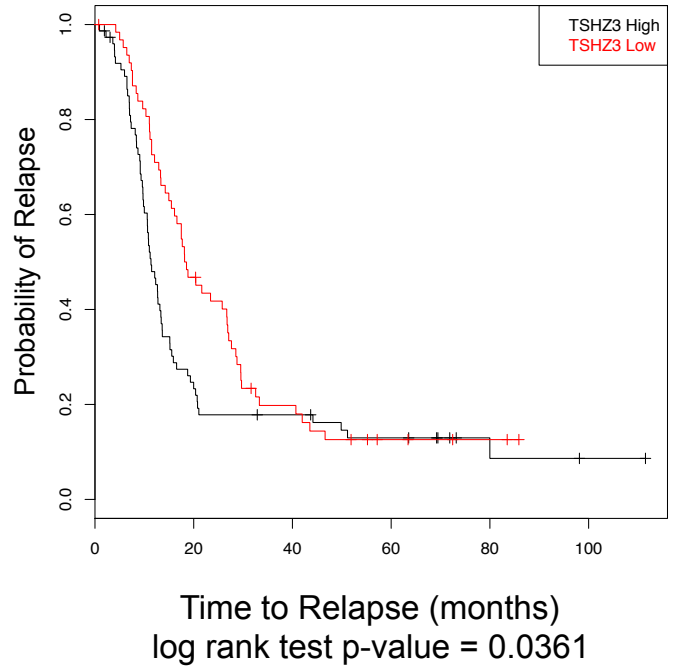

B. TCGA (high-grade serous cases)

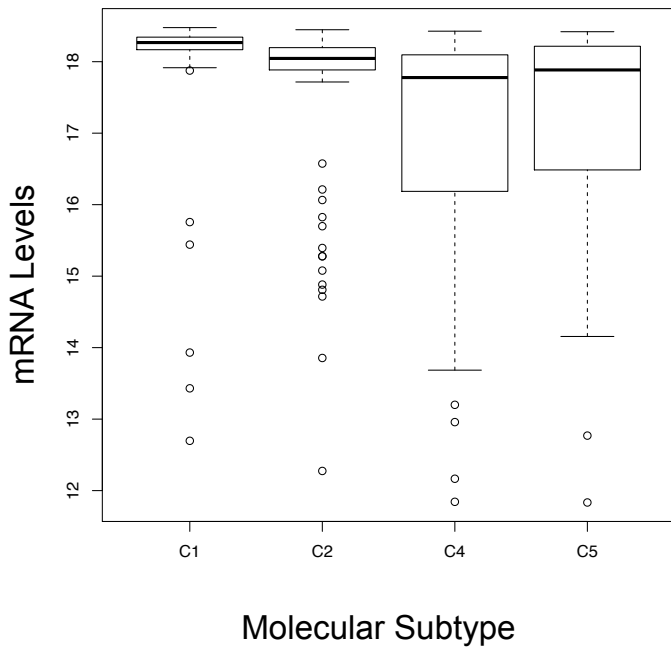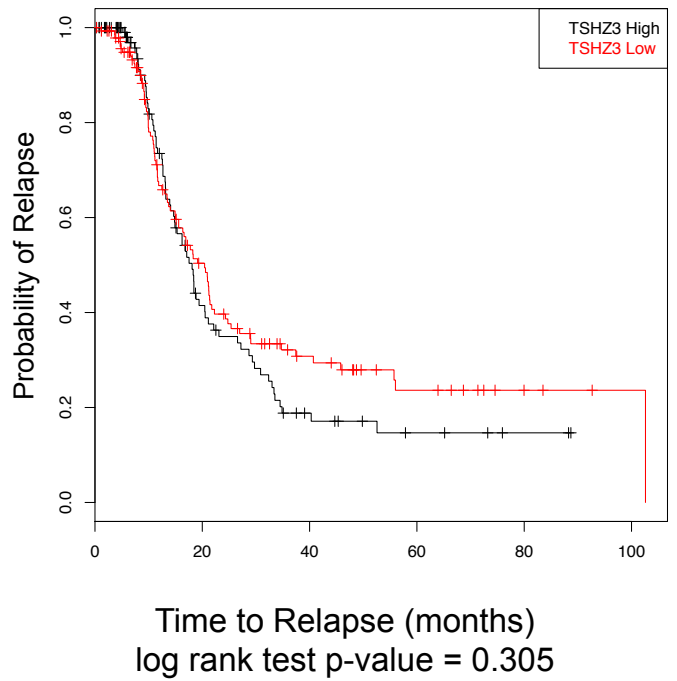

Supplement: path0227-0446-sd1.pdf [file path0227-0446-sd1.pdf]
